# Supplementary material for: Ozone pollution around a coastal region of South China Sea: Interaction between marine and continental air
Source: Copernicus journal article supplement (doi:10.5194/acp-2017-988), 2017-12-20
Supplement: Supplementary file 1 [file acp-2017-988-supplement.pdf]

Supplement of the manuscript “Ozone pollution around a coastal region of South China Sea: Interaction between marine and continental air”

**Table S1.** Gradient separation of C<sub>1</sub> – C<sub>9</sub> aldehyde and ketone derivatives.

|                         |                                                                                          |
|-------------------------|------------------------------------------------------------------------------------------|
| <b>Column</b>           | Nava-Pak C18 3.9 ×150 mm                                                                 |
| <b>Mobile phase</b>     | A: Water/Acetonitrile/Tetrahydrofuran 60/30/10                                           |
| <b>Gradient</b>         | B: Water/Acetonitrile 40/60                                                              |
| <b>Flow rate</b>        | 100% A for 2 min then a linear gradient from 100% A to 100% B in 18 min, 100% B for 4min |
| <b>Injection volume</b> | 20μL                                                                                     |
| <b>Detection</b>        | Absorbance at 360 nm                                                                     |

**Table S2.** Description of parameters used in WRF-CMAQ simulation.

| Model            | Parameters                      | Value                                |
|------------------|---------------------------------|--------------------------------------|
| WRF(v3.7.1)      | <b>Microphysics</b>             | WRF Single-Moment 3-class scheme     |
|                  | <b>Longwave Radiation</b>       | RRTM scheme                          |
|                  | <b>Shortwave Radiation</b>      | Dudhia scheme                        |
|                  | <b>Surface Layer</b>            | MM5 similarity                       |
|                  | <b>Land Surface</b>             | Noah Land Surface Model              |
|                  | <b>Planetary Boundary layer</b> | Yonsei University scheme             |
|                  | <b>Cumulus Parameterization</b> | Kain-Fritsch scheme                  |
|                  | <b>Diffusion Option</b>         | Simple diffusion                     |
|                  | <b>K Option</b>                 | 2d Deformation                       |
|                  | CMAQ(4.7.1)                     | <b>ModDriver</b>                     |
| <b>ModInit</b>   |                                 | init_yamo                            |
| <b>ModAdjc</b>   |                                 | // yamo option does not need denrate |
| <b>ModCpl</b>    |                                 | gencoor                              |
| <b>ModHadv</b>   |                                 | hyamo                                |
| <b>ModVadv</b>   |                                 | vyamo                                |
| <b>ModHdiff</b>  |                                 | multiscale                           |
| <b>ModVdiff</b>  |                                 | acm2_inline                          |
| <b>ModPhot</b>   |                                 | phot                                 |
| <b>ModChem</b>   |                                 | ebi_cb05cl_ae5                       |
| <b>ModAero</b>   |                                 | aero5                                |
| <b>ModCloud</b>  |                                 | cloud_acm_ae5                        |
| <b>ModPa</b>     |                                 | pa                                   |
| <b>ModUtil</b>   |                                 | util                                 |
| <b>Mechanism</b> |                                 | cb05cl_ae5_aq                        |

**Table S3.** Index of agreement (IOA) between the simulated and observed meteorological parameters and air pollutants. IOA was calculated using the equation in Willmott (1982). Within the range of 0 – 1, higher IOA represents better agreement between the simulated and observed values.

|                   | TC   | WS   |
|-------------------|------|------|
| Temperature       | 0.81 | 0.84 |
| Wind speed        | 0.56 | 0.54 |
| Wind direction    | 0.60 | 0.51 |
| Relative humidity | 0.79 | 0.77 |
| CO                | 0.88 | 0.87 |
| NO <sub>x</sub>   | 0.50 | 0.62 |
| O <sub>3</sub>    | 0.81 | 0.81 |

**Table S4.** Summary of O<sub>3</sub> episode days at WS and TC during the sampling period.

| No. | Description                     | Date                    | SLB  | WS                          | O <sub>3</sub> _MAX.        | TC                          | O <sub>3</sub> _MAX. |
|-----|---------------------------------|-------------------------|------|-----------------------------|-----------------------------|-----------------------------|----------------------|
| 0   | Typhoon-related (Trami)         | 0820                    | Y    | near-O <sub>3</sub> episode | 92.6                        | near-O <sub>3</sub> episode | 87.1                 |
| 1   |                                 | 0821                    | N    | episode                     | 173.0                       | episode                     | 159.9                |
| 2   | Typhoon-related (Usagi)         | 0920                    | N    | -                           | 61.4                        | episode                     | 126.8                |
| 3   |                                 | 0921                    | N    | episode                     | 116.0                       | -                           | 69.3                 |
| 4   | Typhoon-related (Wutip)         | 0927                    | Y    | near-O <sub>3</sub> episode | 85.4                        | episode                     | 102.4                |
| 5   |                                 | 0928                    | Y    | episode                     | 109.4                       | -                           | 71.8                 |
| 6   | O <sub>3</sub> episode event I  | 1001                    | N    | near-O <sub>3</sub> episode | 89.8                        | episode                     | 107.5                |
| 7   |                                 | 1002                    | Y    | episode                     | 126.9                       | near-O <sub>3</sub> episode | 91.7                 |
| 8   |                                 | 1003                    | Y    | episode                     | 119.1                       | episode                     | 121.2                |
| 9   |                                 | 1004                    | Y    | episode                     | 121.3                       | episode                     | 119.7                |
| 10  |                                 | 1005                    | Y    | episode                     | 163.2                       | episode                     | 143.1                |
| 11  |                                 | 1006                    | N    | episode                     | 151.9                       | episode                     | 119.7                |
| 12  |                                 | 1007                    | N    | episode                     | 118.7                       | near-O <sub>3</sub> episode | 89.7                 |
| 13  |                                 | 1008                    | N    | episode                     | 138.3                       | near-O <sub>3</sub> episode | 84.1                 |
| 14  | typhoon-related (Nari)          | 1011                    | Y    | episode                     | 130.8                       | episode                     | 130.4                |
| 15  |                                 | 1012                    | Y    | near-O <sub>3</sub> episode | 99.1                        | near-O <sub>3</sub> episode | 90.2                 |
| 16  | O <sub>3</sub> episode event II | 1019                    | Y    | episode                     | 155.0                       | episode                     | 117.7                |
| 17  |                                 | 1020                    | Y    | episode                     | 122.1                       | episode                     | 120.2                |
| 18  |                                 | 1021                    | Y    | episode                     | 124.0                       | episode                     | 144.7                |
| 19  |                                 | 1022                    | N    | episode                     | 148.5                       | episode                     | 104.4                |
| 20  |                                 | 1023                    | N    | episode                     | 152.3                       | episode                     | 119.2                |
| 21  |                                 | 1024                    | N    | episode                     | 148.1                       | episode                     | 116.1                |
| 22  |                                 | 1025                    | N    | episode                     | 135.8                       | near-O <sub>3</sub> episode | 89.1                 |
| 23  |                                 | 1026                    | N    | episode                     | 105.3                       | episode                     | 117.2                |
| 24  |                                 | 1027                    | N    | episode                     | 106.2                       | near-O <sub>3</sub> episode | 99.3                 |
| 25  |                                 | typhoon-related (Krosa) | 1101 | Y                           | near-O <sub>3</sub> episode | 83.2                        | episode              |
| 26  | 1102                            |                         | N    | near-O <sub>3</sub> episode | 95.6                        | -                           | 35.1                 |
| 27  |                                 | 1115                    | N    | episode                     | 109.8                       | -                           | 66.2                 |

Note: An O<sub>3</sub> episode day was defined when the peak one-hour averaged O<sub>3</sub> mixing ratio exceeded 100 ppbv (Level II of China National Ambient Air Quality Standard). A near-O<sub>3</sub> episode days was defined when the peak hourly average O<sub>3</sub> mixing ratio was lower than 100 ppbv but higher than 80 ppbv (Level I of China National Ambient Air Quality Standard).

**Table S5.** Ranking of the top 10 NMHC species observed at TC and WS during O<sub>3</sub> episodes and non- episodes.

| <i>Rank</i> | <b>TC</b>         |                    | <b>WS</b>         |                    |
|-------------|-------------------|--------------------|-------------------|--------------------|
|             | <i>Episode</i>    | <i>Non-episode</i> | <i>Episode</i>    | <i>Non-episode</i> |
| <b>1</b>    | Ethane            | Ethane             | Ethane            | Ethane             |
| <b>2</b>    | Acetylene         | Propane            | Acetylene         | Acetylene          |
| <b>3</b>    | Propane           | <i>i</i> -Butane   | Toluene           | Propane            |
| <b>4</b>    | <i>i</i> -Butane  | Toluene            | <i>i</i> -Butane  | <i>i</i> -Butane   |
| <b>5</b>    | Toluene           | <i>n</i> -Hexane   | Propane           | Toluene            |
| <b>6</b>    | <i>n</i> -Butane  | <i>n</i> -Butane   | <i>n</i> -Butane  | Ethene             |
| <b>7</b>    | Ethene            | Acetylene          | <i>n</i> -Hexane  | <i>i</i> -Pentane  |
| <b>8</b>    | <i>i</i> -Pentane | Ethene             | <i>i</i> -Pentane | <i>n</i> -Butane   |
| <b>9</b>    | <i>n</i> -Hexane  | <i>i</i> -Pentane  | Ethene            | <i>n</i> -Hexane   |
| <b>10</b>   | Benzene           | Benzene            | Benzene           | Benzene            |

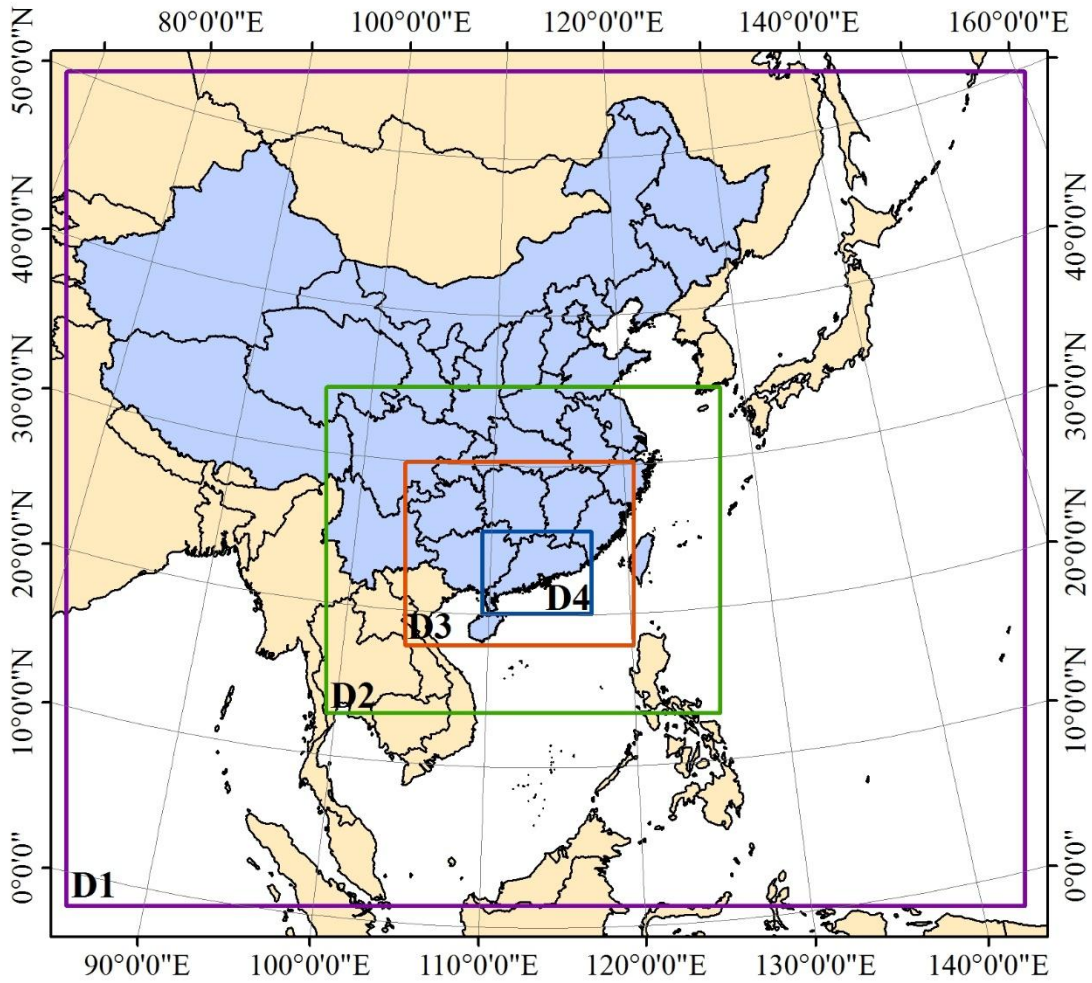

Figure S1 Nesting domain settings of the WRF model. D1, D2, D3 and D4 inside the figure denote domain 1, 2, 3 and 4, respectively. The outermost domain (D1) covers the entire China and East Asia with the resolution of  $81 \text{ km} \times 81 \text{ km}$  and  $89 \times 78$  grids. D2 covers South China with the resolution of  $27 \text{ km} \times 27 \text{ km}$  and  $109 \times 91$  grids. D3 covers Guangdong province and the surrounding areas with the resolution of  $9 \text{ km} \times 9 \text{ km}$  and  $187 \times 151$  grids. The innermost domain (D4) covers Pearl River Delta region with the resolution of  $3 \text{ km} \times 3 \text{ km}$  and  $186 \times 150$  grids.

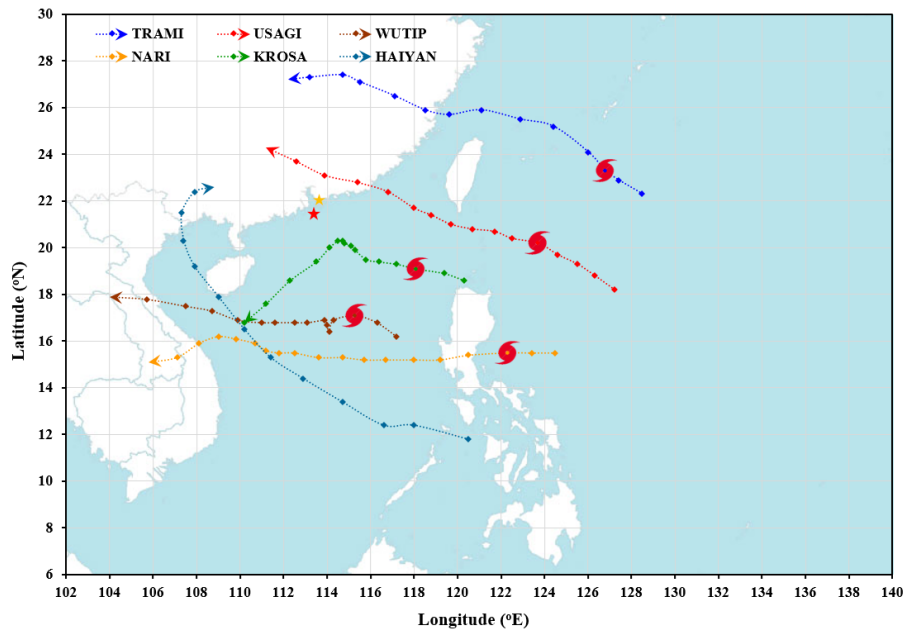

**Figure S2.** Track of typhoons during the sampling period. The typhoon labels mark the positions when O<sub>3</sub> episodes occur in Hong Kong. The dots represent intermediate 6-hourly positions.

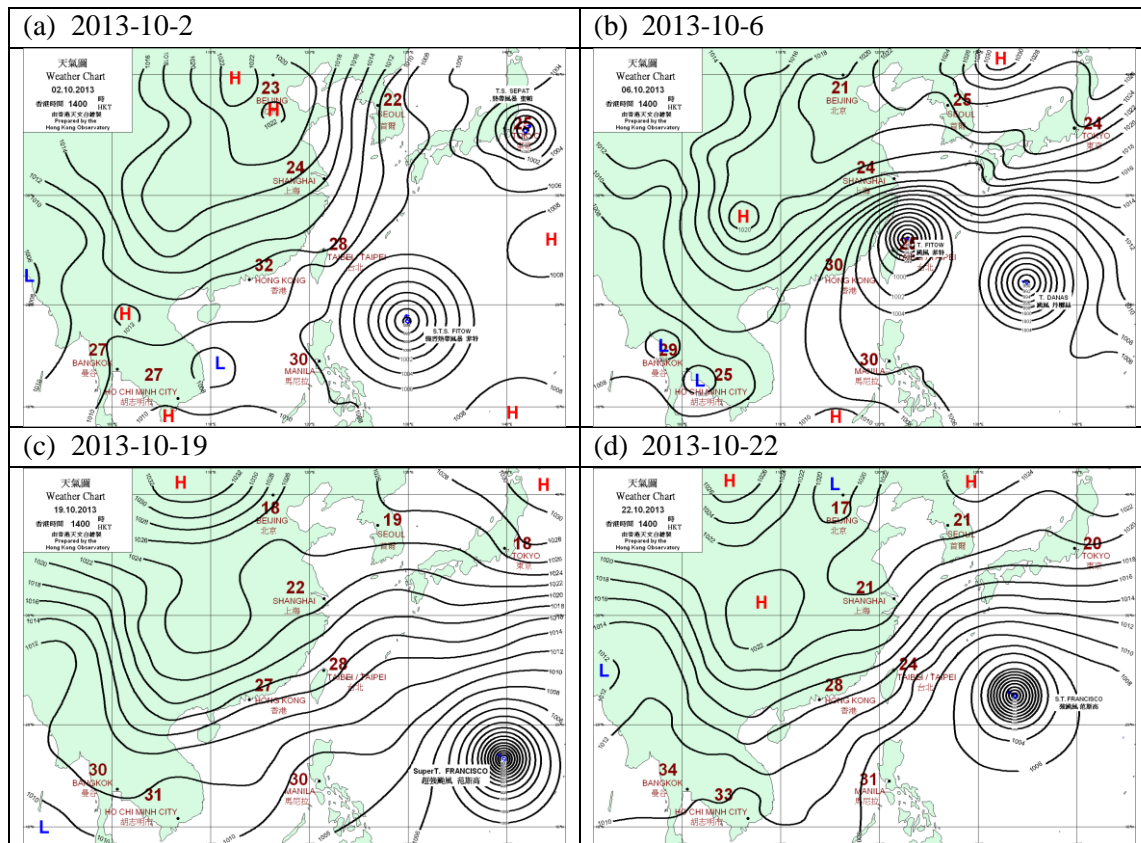

**Figure S3.** Selected examples of weather charts at 6 am during Continental High Pressure in October 2013. (a) & (c) Continental high pressure systems formed far away from the coastal areas and caused SLBs related O<sub>3</sub> episodes; (b) & (d) Continental high pressure systems approaching to the coastal areas and caused O<sub>3</sub> episodes not related to SLBs; The maps are courtesy provided by Hong Kong Observatory.

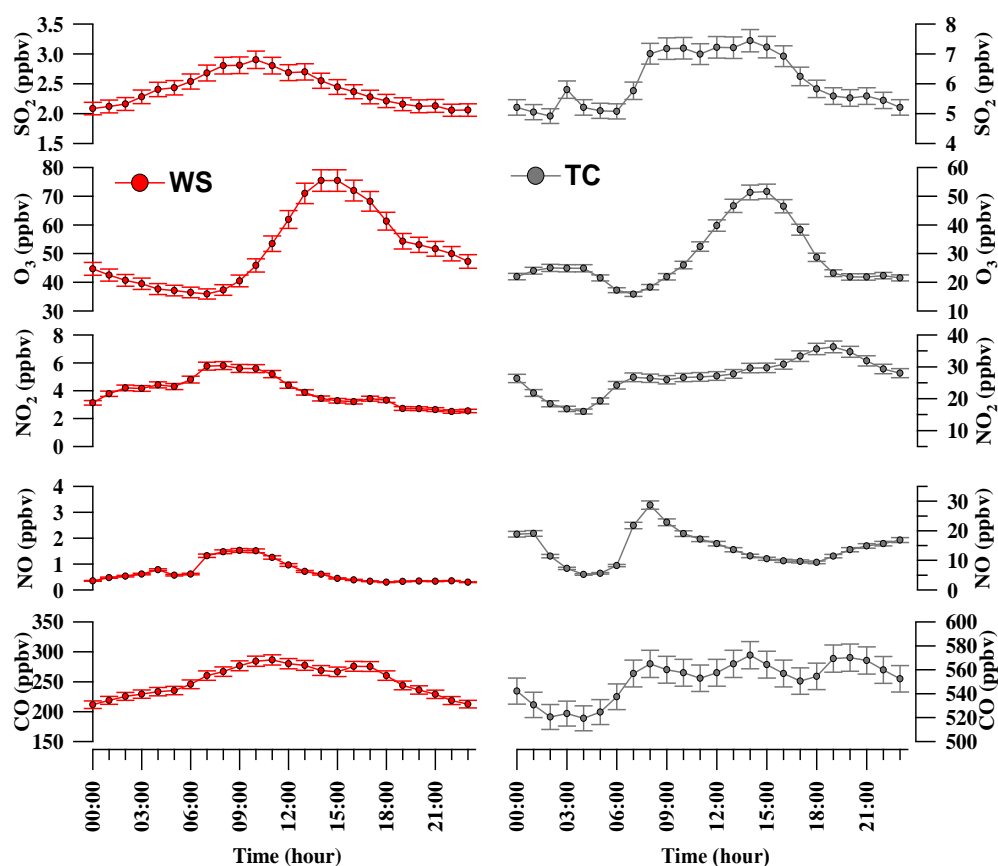

**Figure S4.** Diurnal variations of trace gases measured at WS and TC.

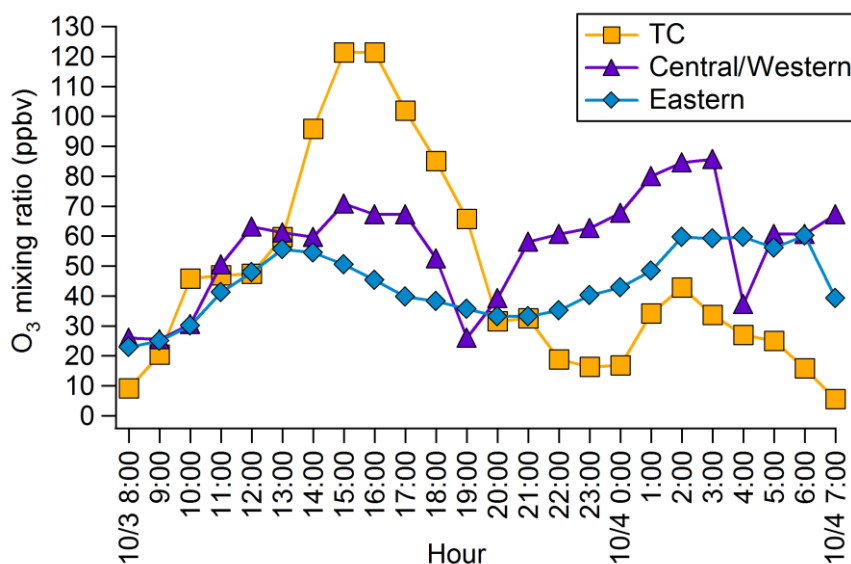

**Figure S5.** Hourly average  $O_3$  observed at TC, Central/Western and Eastern from 08:00 on 3 October to 07:00 on 4 October. The three sites were located in southern Hong Kong, which were all non-roadside sites. Detailed information can be found on the website of HKEPD (<http://www.aqhi.gov.hk/en/monitoring-network/air-quality-monitoring-stations9c57.html?stationid=81>).
